# Supplementary material for: Identification of miRNAs Mediating Seed Storability of Maize during Germination Stage by High-Throughput Sequencing, Transcriptome and Degradome Sequencing
Source: MDPI journal article supplement (doi:10.3390/ijms232012339), 2022-10-15
Supplement: s1 [file s1]

**Supplementary Table S8 Sorting of sequencing data**

| Group                        | Definition                                                                                                                                                                                                                                                                                                                                      |
|------------------------------|-------------------------------------------------------------------------------------------------------------------------------------------------------------------------------------------------------------------------------------------------------------------------------------------------------------------------------------------------|
| group1a                      | Reads can be compared to the known pre miRNAs of miRBase, and the precursors can be further compared to the genome                                                                                                                                                                                                                              |
| group1b                      | Reads can be compared to the pre miRNAs of selected species known to miRBase, and the precursors can be further compared to the genome                                                                                                                                                                                                          |
| group2a                      | Reads can be compared to the precursors (pre miRNAs) of miRBase selected species. Precursors cannot be further compared to the genome of this species, but reads can be compared to the genome. Extended genome sequence can form hairpin structure meeting 11 principles                                                                       |
| group2b                      | Reads can be compared to the precursors (pre miRNAs) of miRBase selected species. Precursors cannot be further compared to the genome of this species, but reads can be compared to the genome. The extended genome sequence cannot form a hairpin structure meeting the 11 principles                                                          |
| group3a                      | Reads can be compared to the precursors (pre miRNAs) of miRBase selected species, and the precursors cannot be further compared to the genome, nor can reads be compared to the genome. The number of Reads on the comparison in the cluster, the number of copies $> 1$ , and the representative score of Reads $> 260$ . There is no mismatch |
| group4a<br>(novel<br>miRNAs) | Reads cannot be compared to the precursors (pre miRNAs) of miRBase selected species. Reads can be compared to the genome. Extended genome sequence can form hairpin structure meeting 11 principles                                                                                                                                             |
