# Supplementary material for: Identification of miRNAs Mediating Seed Storability of Maize during Germination Stage by High-Throughput Sequencing, Transcriptome and Degradome Sequencing
Source: MDPI journal article supplement (doi:10.3390/ijms232012339), 2022-10-15
Supplement: s1 [file s1]

**Supplementary Table S3 Known miRNA and its corresponding target gene information**

| MiRNA                     | Transcript            | Description                                                         |
|---------------------------|-----------------------|---------------------------------------------------------------------|
| <i>zma-miR156a-5p</i>     | <i>GRMZM5G836353</i>  | uncharacterized protein LOC100217292                                |
| <i>zma-miR156e-3p</i>     | <i>GRMZM2G119865</i>  | ethylene-responsive transcription factor RAP2-9                     |
| <i>_L+1_2ss14CA22TC</i>   | <i>GRMZM2G399072</i>  | AP2-like ethylene-responsive transcription factor BBM2 isoform X2   |
| <i>zma-miR162-3p_R+1</i>  | <i>GRMZM2G477314</i>  | CF9                                                                 |
|                           | <i>GRMZM2G040762</i>  | uncharacterized protein LOC100381417 isoform X1                     |
|                           | <i>GRMZM2G079066</i>  | uncharacterized protein LOC100276268                                |
|                           | <i>GRMZM2G040762</i>  | uncharacterized protein LOC100381417 isoform X1                     |
| <i>zma-miR164a-5p</i>     | <i>GRMZM2G180452</i>  | putative HLH DNA-binding domain superfamily protein                 |
|                           | <i>GRMZM2G168681</i>  | farnesyl pyrophosphate synthase                                     |
|                           | <i>GRMZM2G027023</i>  | uncharacterized protein LOC100279353 isoform 2                      |
|                           | <i>GRMZM2G104262</i>  | cryptochrome 2                                                      |
|                           | <i>GRMZM2G167651</i>  | golgin candidate 4 isoform X2                                       |
|                           | <i>GRMZM2G027023</i>  | uncharacterized protein LOC100279353 isoform 2                      |
|                           | <i>GRMZM2G167651</i>  | golgin candidate 4 isoform X2                                       |
| <i>zma-miR166l-3p</i>     | <i>GRMZM2G028086</i>  | Calcium-dependent protein kinase 7                                  |
|                           | <i>GRMZM2G144407</i>  | uncharacterized protein LOC100192720                                |
|                           | <i>GRMZM5G813259</i>  | CRM-domain containing factor CFM3, chloroplastic/mitochondrial-like |
| <i>zma-miR167c-3p_L-1</i> | <i>GRMZM2G102475</i>  | putative pinin_SDK_memA domain family protein isoform 2             |
|                           | <i>GRMZM2G153181</i>  | uncharacterized protein LOC100384046                                |
|                           | <i>GRMZM2G179097</i>  | cyclin-dependent kinase G-2-like isoform X1                         |
|                           | <i>GRMZM2G066449</i>  | LOW QUALITY PROTEIN: atherin                                        |
|                           | <i>XM_008675682.3</i> | BSD domain-containing protein 1                                     |
|                           | <i>XM_008682762.2</i> | putative pinin_SDK_memA domain family protein isoform 2             |
| <i>zma-miR167e-5p</i>     | <i>GRMZM2G003656</i>  | RING finger protein 13 precursor                                    |
|                           | <i>GRMZM2G096622</i>  | uncharacterized protein LOC100193197 isoform X1                     |
|                           | <i>GRMZM2G003656</i>  | RING finger protein 13 precursor                                    |
| <i>zma-MIR167j-p3</i>     | <i>GRMZM2G160032</i>  | putative transcription factor                                       |
| <i>_2ss12AT20TA</i>       |                       |                                                                     |
| <i>zma-miR169o-3p</i>     | <i>GRMZM2G104078</i>  | putative NAC domain transcription factor superfamily protein        |
| <i>_L-1R+1</i>            | <i>GRMZM2G067225</i>  | allene-oxide synthase1                                              |
|                           | <i>GRMZM5G822947</i>  | uncharacterized protein LOC100276769                                |
| <i>zma-miR169o-3p</i>     | <i>GRMZM2G403797</i>  | protein WHAT'S THIS FACTOR 1, chloroplastic                         |
| <i>_L-1R+1</i>            | <i>Zm00001d035838</i> | 60S ribosomal protein L39-1                                         |
|                           | <i>GRMZM2G105400</i>  | uncharacterized LOC100281161                                        |
|                           | <i>GRMZM2G026447</i>  | uncharacterized protein LOC100281668                                |
|                           | <i>GRMZM2G074017</i>  | ATPase inhibitor                                                    |
|                           | <i>GRMZM2G031496</i>  | unknown                                                             |
|                           | <i>Zm00001d018986</i> | Protein WVD2-like 2                                                 |

---

|                           |                       |                                                              |
|---------------------------|-----------------------|--------------------------------------------------------------|
|                           | <i>GRMZM2G144387</i>  | unknown                                                      |
|                           | <i>GRMZM2G072806</i>  | uncharacterized protein LOC100283266                         |
|                           | <i>GRMZM5G890820</i>  | uncharacterized LOC100216726                                 |
|                           | <i>GRMZM2G107092</i>  | uncharacterized protein LOC107457590 isoform X1              |
|                           | <i>GRMZM2G082032</i>  | probable isoaspartyl peptidase/L-asparaginase 2              |
|                           | <i>GRMZM2G069254</i>  | uncharacterized LOC100275405                                 |
|                           | <i>GRMZM2G094581</i>  | E3 UFM1-protein ligase 1 homolog                             |
|                           | <i>GRMZM2G389362</i>  | vacuolar-sorting receptor 1                                  |
|                           | <i>GRMZM2G117776</i>  | filaggrin-2                                                  |
|                           | <i>GRMZM2G107092</i>  | uncharacterized protein LOC107457590 isoform X1              |
|                           | <i>GRMZM2G312110</i>  | auxin transport protein BIG                                  |
|                           | <i>GRMZM2G369991</i>  | 60S ribosomal protein L10a                                   |
|                           | <i>GRMZM5G890820</i>  | uncharacterized LOC100216726                                 |
| <i>zma-miR169o-5p_R-1</i> | <i>GRMZM2G115674</i>  | uncharacterized protein LOC100277219                         |
|                           | <i>GRMZM2G091964,</i> | uncharacterized protein LOC100282719 isoform X1              |
|                           | <i>GRMZM2G141636</i>  | uncharacterized protein LOC100193940 isoform X1              |
|                           | <i>GRMZM5G829103</i>  | nuclear transcription factor Y subunit A-10 isoform X1       |
|                           | <i>GRMZM2G165488</i>  | uncharacterized LOC100193094                                 |
|                           | <i>GRMZM2G091964</i>  | uncharacterized protein LOC100282719 isoform X1              |
| <i>zma-MIR319a-p5</i>     | <i>GRMZM2G064390</i>  | uncharacterized protein LOC100273603 isoform X1              |
|                           | <i>GRMZM2G044733</i>  | autophagy-related protein 13b                                |
| <i>zma-MIR319b-p5</i>     | <i>GRMZM2G359038</i>  | NA                                                           |
|                           | <i>GRMZM2G359038,</i> | uncharacterized protein LOC100272602 isoform X1              |
| <i>zma-MIR319d-p5</i>     | <i>GRMZM2G478417</i>  | bZIP transcription factor TRAB1                              |
| <i>zma-miR390a-5p</i>     | <i>GRMZM2G416701</i>  | AP2-like ethylene-responsive transcription factor TOE3       |
|                           | <i>GRMZM2G042920</i>  | Transcription factor PIF4                                    |
|                           | <i>GRMZM2G134396</i>  | uncharacterized protein LOC100275036                         |
| <i>zma-miR396a-5p</i>     | <i>GRMZM2G107092</i>  | uncharacterized protein LOC107457590 isoform X1              |
| <i>zma-miR396c_L-1</i>    | <i>GRMZM2G055782</i>  | MADS-box transcription factor 27 isoform X1                  |
| <i>zma-miR396c_L-1</i>    | <i>GRMZM2G152908</i>  | sucrose synthase 2 isoform X1                                |
|                           | <i>GRMZM2G041223</i>  | putative growth-regulating factor 6                          |
|                           | <i>GRMZM2G033612</i>  | uncharacterized protein LOC100101540                         |
|                           | <i>GRMZM2G124566</i>  | growth-regulating factor                                     |
|                           | <i>GRMZM2G098594</i>  | putative growth-regulating factor 14                         |
|                           | <i>GRMZM2G179941</i>  | stromal processing peptidase, chloroplastic                  |
|                           | <i>GRMZM2G105335</i>  | putative growth-regulating factor 3                          |
|                           | <i>GRMZM2G119359</i>  | putative growth-regulating factor 12                         |
|                           | <i>GRMZM2G152908</i>  | sucrose synthase 2 isoform X1                                |
| <i>zma-miR397a-5p</i>     | <i>GRMZM2G166659</i>  | 60S ribosomal protein L23a-like isoform X1 [Sorghum bicolor] |
|                           | <i>GRMZM2G134806</i>  | hsc70-interacting protein                                    |
|                           | <i>GRMZM2G410152</i>  | uncharacterized protein LOC100286327                         |
| <i>zma-MIR397b-p5</i>     | <i>GRMZM2G033230</i>  | putative bZIP transcription factor superfamily protein       |
|                           | <i>GRMZM2G006119</i>  | corticosteroid 11-beta-dehydrogenase isozyme 1               |
|                           | <i>GRMZM2G120652</i>  | Pyridoxal 5'-phosphate synthase-like subunit PDX1.2          |

---

|                            |                |                                                                   |
|----------------------------|----------------|-------------------------------------------------------------------|
|                            | GRMZM2G134806  | hsc70-interacting protein                                         |
|                            | Zm00001d038980 | IAA19 - auxin-responsive Aux/IAA family member                    |
|                            | GRMZM5G834758  | DNA-binding protein, partial                                      |
|                            | GRMZM2G139349  | 40S ribosomal protein S25-1                                       |
|                            | GRMZM5G867518  | uncharacterized protein LOC100283674                              |
|                            | GRMZM2G397002  | 40S ribosomal protein S25-3                                       |
|                            | GRMZM2G044348  | NA                                                                |
| <i>zma-miR398b-5p_R-1</i>  | GRMZM2G080516  | AP2-EREBP transcription factor                                    |
|                            | GRMZM2G131577  | Transcription factor BTF3                                         |
|                            | GRMZM2G141679  | ethylene-responsive transcription factor RAP2-13-like             |
|                            | GRMZM2G416701  | AP2-like ethylene-responsive transcription factor TOE3            |
|                            | GRMZM2G180452  |                                                                   |
|                            | GRMZM2G001444  | unknown                                                           |
|                            | GRMZM2G177878  | uncharacterized protein LOC100279545                              |
|                            | GRMZM2G131577  | Transcription factor BTF3                                         |
|                            | GRMZM2G338259  | auxin response factor 10                                          |
|                            | GRMZM2G409224  | uncharacterized protein LOC100273824                              |
|                            | GRMZM2G001444  |                                                                   |
| <i>zma-miR408a_L-1</i>     | GRMZM2G180328  | putative NAC domain transcription factor superfamily protein      |
|                            | GRMZM2G399072  | AP2-like ethylene-responsive transcription factor BBM2 isoform X2 |
|                            | GRMZM2G169688  | transcription factor GTE8                                         |
|                            | GRMZM2G093175  | asparagine synthetase 2                                           |
| <i>zma-miR408a_L-1</i>     | GRMZM2G002898  | putative cytochrome P450 superfamily protein                      |
|                            | GRMZM2G161245  | Malate dehydrogenase                                              |
|                            | GRMZM2G325118  | unknown                                                           |
|                            | GRMZM2G134976  | uncharacterized protein LOC100275636                              |
|                            | GRMZM2G478709  | pre-mRNA-splicing factor prp45                                    |
|                            | GRMZM2G488465  | uncharacterized protein LOC100381775                              |
|                            | GRMZM2G077340  | hypothetical protein Zm00014a_040048                              |
| <i>zma-miR408a_L-1</i>     | GRMZM2G336456  | uncharacterized protein LOC103647431                              |
| <i>zma-miR444a_1ss12TC</i> | GRMZM2G399072  | AP2-like ethylene-responsive transcription factor BBM2 isoform X2 |
|                            | GRMZM2G001024  | putative RING/U-box superfamily protein                           |
|                            | GRMZM2G439201  | elongation factor 1-beta                                          |
|                            | GRMZM2G127139  | zeaxanthin epoxidase                                              |
|                            | GRMZM2G380377  | DRE-binding protein 4                                             |
|                            | GRMZM2G096764  | ATP-dependent zinc metalloprotease FTSH 4 mitochondrial           |
|                            | GRMZM2G064767  | unknown                                                           |
|                            | GRMZM2G001024  | putative RING/U-box superfamily protein                           |
|                            | GRMZM2G179325  | scarecrow-like protein 34                                         |
|                            | GRMZM2G127139  | zeaxanthin epoxidase                                              |
| <i>zma-miR529-5p</i>       | GRMZM2G146862  | general transcription factor 3C polypeptide 3 isoform X1          |
|                            | GRMZM6G729818  | uncharacterized protein LOC100191463                              |
|                            | GRMZM2G031501  | uncharacterized protein LOC100272713                              |
|                            | GRMZM2G017804  | uncharacterized protein LOC100277723 precursor                    |

---

|                           |                      |                                                                 |
|---------------------------|----------------------|-----------------------------------------------------------------|
|                           | <i>GRMZM2G061734</i> | <i>SBP-transcription factor 5</i>                               |
|                           | <i>GRMZM2G074489</i> | <i>probable protein phosphatase 2C 44</i>                       |
|                           | <i>GRMZM2G061734</i> | <i>SBP-transcription factor 5</i>                               |
|                           | <i>GRMZM2G095782</i> | <i>tRNA pseudouridine synthase</i>                              |
| <i>zma-miR827-3p</i>      | <i>GRMZM2G003992</i> | <i>uncharacterized protein LOC100279277</i>                     |
|                           | <i>GRMZM2G077531</i> | <i>uncharacterized protein LOC100383043</i>                     |
| <i>zma-miR827-5p_L+1</i>  | <i>GRMZM2G536825</i> | <i>NA</i>                                                       |
| <i>zma-miR169o-5p_R-1</i> | <i>GRMZM2G536825</i> | <i>L10-interacting MYB domain-containing protein isoform X2</i> |

---
