# Supplementary material for: Identification of miRNAs Mediating Seed Storability of Maize during Germination Stage by High-Throughput Sequencing, Transcriptome and Degradome Sequencing
Source: MDPI journal article supplement (doi:10.3390/ijms232012339), 2022-10-15
Supplement: s1 [file s1]

**Supplementary Table S5 GO enrichment circle of differentially expressed genes in comparison group AA156VSAA237**

| Index | GO_ID      | GO_Category        | B    | S    | Up_Num | Down_Num | Rich.Factor | -log10(Q) | hjust | angle    | TB_Fill | Text_Colour |
|-------|------------|--------------------|------|------|--------|----------|-------------|-----------|-------|----------|---------|-------------|
| 1     | GO:0042939 | Biological Process | 23   | 16   | 11     | 5        | 0.6957      | 1.072896  | 0     | -6       | #FB9272 | white       |
| 2     | GO:0009741 | Biological Process | 55   | 32   | 21     | 11       | 0.5818      | 1.302728  | 0     | -19      | #FB9272 | white       |
| 3     | GO:0009969 | Biological Process | 48   | 27   | 14     | 13       | 0.5625      | 0.897727  | 0     | -32      | #FB9272 | white       |
| 4     | GO:0009832 | Biological Process | 94   | 48   | 31     | 17       | 0.5106      | 1.111182  | 0     | -45      | #FB9272 | white       |
| 5     | GO:0052696 | Biological Process | 205  | 104  | 28     | 76       | 0.5073      | 3.78599   | 0     | -58      | #F8684B | white       |
| 6     | GO:0009813 | Biological Process | 237  | 112  | 31     | 81       | 0.4726      | 2.610072  | 0     | -71      | #F8684B | white       |
| 7     | GO:0007169 | Biological Process | 202  | 90   | 58     | 32       | 0.4455      | 1.072896  | 0     | -84      | #F8684B | white       |
| 8     | GO:0009409 | Biological Process | 322  | 134  | 68     | 66       | 0.4161      | 1.008329  | 0     | 85       | #F8684B | white       |
| 9     | GO:0006468 | Biological Process | 1022 | 387  | 224    | 163      | 0.3787      | 1.072896  | 0     | 71.66667 | #F8684B | white       |
| 10    | GO:0000795 | Cellular Component | 20   | 13   | 11     | 2        | 0.65        | 0.49545   | 0     | 58.33333 | #FB9272 | white       |
| 11    | GO:0043231 | Cellular Component | 456  | 192  | 71     | 121      | 0.4211      | 1.943756  | 0     | 45       | #F8684B | white       |
| 12    | GO:0009505 | Cellular Component | 324  | 133  | 60     | 73       | 0.4105      | 0.812026  | 0     | 31.66667 | #F8684B | white       |
| 13    | GO:0046658 | Cellular Component | 267  | 109  | 46     | 63       | 0.4082      | 0.49545   | 0     | 18.33333 | #F8684B | white       |
| 14    | GO:0005768 | Cellular Component | 419  | 171  | 113    | 58       | 0.4081      | 1.072896  | 0     | 5        | #F8684B | white       |
| 15    | GO:0000139 | Cellular Component | 377  | 149  | 92     | 57       | 0.3952      | 0.49545   | 0     | -6       | #F8684B | white       |
| 16    | GO:0005576 | Cellular Component | 1302 | 482  | 243    | 239      | 0.3702      | 1.008329  | 0     | -19      | #F8684B | white       |
| 17    | GO:0005794 | Cellular Component | 1439 | 530  | 321    | 209      | 0.3683      | 1.021239  | 0     | -32      | #F8684B | white       |
| 18    | GO:0005886 | Cellular Component | 4108 | 1464 | 858    | 606      | 0.3564      | 1.943756  | 0     | -45      | #F8684B | white       |
| 19    | GO:0016021 | Cellular Component | 3605 | 1285 | 746    | 539      | 0.3564      | 1.537741  | 0     | -58      | #F8684B | white       |
| 20    | GO:0042937 | Molecular Function | 23   | 16   | 11     | 5        | 0.6957      | 1.072896  | 0     | -71      | #FB9272 | black       |
| 21    | GO:0016705 | Molecular Function | 33   | 21   | 6      | 15       | 0.6364      | 1.072896  | 0     | -84      | #FB9272 | black       |
| 22    | GO:0008061 | Molecular Function | 44   | 26   | 5      | 21       | 0.5909      | 1.072896  | 0     | 85       | #FB9272 | black       |
| 23    | GO:0016759 | Molecular Function | 49   | 28   | 22     | 6        | 0.5714      | 1.064647  | 0     | 71.66667 | #FB9272 | black       |

|    |            |                    |      |     |     |     |        |          |   |          |         |       |
|----|------------|--------------------|------|-----|-----|-----|--------|----------|---|----------|---------|-------|
| 24 | GO:0004568 | Molecular Function | 49   | 28  | 6   | 22  | 0.5714 | 1.064647 | 0 | 58.33333 | #FB9272 | black |
| 25 | GO:0080043 | Molecular Function | 180  | 93  | 25  | 68  | 0.5167 | 3.78599  | 0 | 45       | #F8684B | black |
| 26 | GO:0080044 | Molecular Function | 180  | 93  | 25  | 68  | 0.5167 | 3.78599  | 0 | 31.66667 | #F8684B | black |
| 27 | GO:0016757 | Molecular Function | 481  | 196 | 119 | 77  | 0.4075 | 1.218809 | 0 | 18.33333 | #F8684B | black |
| 28 | GO:0004674 | Molecular Function | 1106 | 411 | 243 | 168 | 0.3716 | 0.814395 | 0 | 5        | #F8684B | black |
