# Supplementary material for: Identification of miRNAs Mediating Seed Storability of Maize during Germination Stage by High-Throughput Sequencing, Transcriptome and Degradome Sequencing
Source: MDPI journal article supplement (doi:10.3390/ijms232012339), 2022-10-15
Supplement: s1 [file s1]

**Supplementary Table S7 GO terms for miRNA-mRNA**

| miRNA-mRNA-GO                                                       |               |                                                              |
|---------------------------------------------------------------------|---------------|--------------------------------------------------------------|
| A:miR169o-5p-GRMZM2G165488- GO:0016602\ GO:0009793\ GO:0006355-DGEs |               |                                                              |
| GO                                                                  | Gene          | Description                                                  |
| GO:0016602                                                          | GRMZM2G091964 | uncharacterized protein                                      |
| GO:0016602                                                          | GRMZM2G104396 | Nuclear transcription factor Y subunit A-7                   |
| GO:0016602                                                          | GRMZM2G165488 | uncharacterized protein                                      |
| GO:0016602                                                          | GRMZM5G829103 | nuclear transcription factor Y subunit A-10 isoform X1       |
| GO:0009793                                                          | GRMZM2G091964 | uncharacterized protein                                      |
| GO:0009793                                                          | GRMZM2G134396 | Nuclear transcription factor Y subunit A-7                   |
| GO:0009793                                                          | GRMZM2G347043 | NAC1 transcription factor                                    |
|                                                                     |               | CRM-domain containing factor CFM3,                           |
| GO:0009793                                                          | GRMZM5G813259 | chloroplastic/mitochondrial-like                             |
| GO:0009793                                                          | GRMZM2G002898 | putative cytochrome P450 superfamily protein                 |
| GO:0009793                                                          | GRMZM2G161245 | Malate dehydrogenase                                         |
|                                                                     |               | putative bZIP transcription factor superfamily protein       |
| GO:0006355                                                          | GRMZM2G033230 |                                                              |
| GO:0006355                                                          | GRMZM2G179325 | scarecrow-like protein 34                                    |
| GO:0006355                                                          | GRMZM2G416701 | AP2-like ethylene-responsive transcription factor TOE3       |
| GO:0006355                                                          | GRMZM2G033612 | uncharacterized protein                                      |
| GO:0006355                                                          | GRMZM2G165488 | uncharacterized protein                                      |
| GO:0006355                                                          | GRMZM2G380377 | DRE-binding protein 4                                        |
| GO:0006355                                                          | GRMZM2G478417 | bZIP transcription factor TRAB1                              |
|                                                                     |               | AP2-like ethylene-responsive transcription factor BBM2       |
| GO:0006355                                                          | GRMZM2G399072 | isoform X2                                                   |
| GO:0006355                                                          | GRMZM2G416701 | AP2-like ethylene-responsive transcription factor TOE3       |
| GO:0006355                                                          | GRMZM2G061734 | SBP-transcription factor 5                                   |
| GO:0006355                                                          | GRMZM2G180328 | putative NAC domain transcription factor superfamily protein |
| GO:0006355                                                          | mbd109        | unknown                                                      |
| GO:0006355                                                          | GRMZM2G104396 | Nuclear transcription factor Y subunit A-7                   |
| GO:0006355                                                          | GRMZM5G829103 | nuclear transcription factor Y subunit A-10 isoform X1       |
| GO:0006355                                                          | GRMZM2G086573 | AP2-like ethylene-responsive transcription factor AIL5       |
| GO:0006355                                                          | GRMZM2G131577 | Transcription factor BTF3                                    |
| GO:0006355                                                          | GRMZM2G119865 | ethylene-responsive transcription factor RAP2-9              |
| GO:0006355                                                          | GRMZM2G061734 | SBP-transcription factor 5                                   |
|                                                                     |               | ethylene-responsive transcription factor RAP2-13-like        |
| GO:0006355                                                          | GRMZM2G141679 |                                                              |
| GO:0006355                                                          | GRMZM2G091964 | uncharacterized protein LOC100282719 isoform X1              |
|                                                                     |               | AP2-like ethylene-responsive transcription factor BBM2       |
| GO:0006355                                                          | GRMZM2G399072 | isoform X2                                                   |
|                                                                     |               | uncharacterized protein                                      |
| GO:0006355                                                          | GRMZM2G488465 |                                                              |
| GO:0006355                                                          | GRMZM2G025062 | AP2-EREBP transcription factor, partial                      |

|                                                                                      |               |                                                              |
|--------------------------------------------------------------------------------------|---------------|--------------------------------------------------------------|
| GO:0006355                                                                           | GRMZM2G104078 | putative NAC domain transcription factor superfamily protein |
| GO:0006355                                                                           | GRMZM2G133568 | MADS-box transcription factor 27 isoform X1                  |
| GO:0006355                                                                           | GRMZM2G124566 | growth-regulating factor                                     |
| GO:0006355                                                                           | GRMZM2G409224 | uncharacterized protein                                      |
| B:zma-miR390a-5p-GRMZM2G134396\ GO:0009737\ GO:0009793\ GO:0003876-DEGs              |               |                                                              |
| GO                                                                                   | Gene          | Description                                                  |
| GO:0009737                                                                           | GRMZM2G478709 | pre-mRNA-splicing factor prp45                               |
| GO:0009737                                                                           | GRMZM2G338259 | auxin response factor 10                                     |
|                                                                                      |               | CRM-domain containing factor CFM3,                           |
| GO:0009737                                                                           | GRMZM5G813259 | chloroplastic/mitochondrial-like                             |
| GO:0009737                                                                           | GRMZM2G006119 | corticosteroid 11-beta-dehydrogenase isozyme 1               |
| GO:0009737                                                                           | GRMZM2G134396 | WRKY transcription factor, partial                           |
| GO:0009793                                                                           | GRMZM2G091964 | uncharacterized protein LOC100282719 isoform X1              |
| GO:0009793                                                                           | GRMZM2G134396 | WRKY transcription factor, partial                           |
| GO:0009793                                                                           | GRMZM2G347043 | NAC1 transcription factor                                    |
|                                                                                      |               | CRM-domain containing factor CFM3,                           |
| GO:0009793                                                                           | GRMZM5G813259 | chloroplastic/mitochondrial-like                             |
| GO:0009793                                                                           | GRMZM2G002898 | putative cytochrome P450 superfamily protein                 |
| GO:0009793                                                                           | GRMZM2G161245 | Malate dehydrogenase                                         |
| GO:0003876                                                                           | GRMZM2G134396 | WRKY transcription factor, partial                           |
| C:zma-miR396c_L-1-GRMZM2G098594\ GO:0008757\ GO:0032259\ GO:0009739\ GO:0030912-DEGs |               |                                                              |
| GO                                                                                   | Gene          | Description                                                  |
| GO:0008757                                                                           | GRMZM2G041223 | putative growth-regulating factor 6                          |
| GO:0008757                                                                           | GRMZM2G119359 | putative growth-regulating factor 12                         |
| GO:0008757                                                                           | GRMZM2G098594 | putative growth-regulating factor 14                         |
| GO:0032259                                                                           | GRMZM2G041223 | putative growth-regulating factor 6                          |
| GO:0032259                                                                           | GRMZM2G119359 | putative growth-regulating factor 12                         |
| GO:0032259                                                                           | GRMZM2G098594 | putative growth-regulating factor 14                         |
| GO:0032259                                                                           | GRMZM2G172529 | uncharacterized protein                                      |
| GO:0009739                                                                           | GRMZM2G133568 | MADS-box transcription factor 27 isoform X1                  |
| GO:0030912                                                                           | GRMZM2G133568 | MADS-box transcription factor 27 isoform X1                  |
| D:zma-miR396c_L-1-GRMZM2G105335\ GO:0009739\ GO:0030912-DEGs                         |               |                                                              |
| GO                                                                                   | Gene          | Description                                                  |
| GO:0009739                                                                           | GRMZM2G105335 | putative growth-regulating factor 3                          |
| GO:0030912                                                                           | GRMZM2G105335 | putative growth-regulating factor 3                          |
| E:zma-miR396c_L-1-GRMZM2G133568\ GO:0000977\ GO:0007275-DEGs                         |               |                                                              |
| GO                                                                                   | Gene          | Description                                                  |
| GO:0000977                                                                           | GRMZM2G421212 | GATA transcription factor 26                                 |
| GO:0000977                                                                           | GRMZM2G133568 | MADS-box transcription factor 27 isoform X1                  |
| GO:0000977                                                                           | GATA23        | GATA transcription factor 23                                 |
|                                                                                      |               | AP2-like ethylene-responsive transcription factor BBM2       |
| GO:0007275                                                                           | GRMZM2G399072 | isoform X2                                                   |
| GO:0007275                                                                           | GRMZM2G347043 | NAC1 transcription factor                                    |

|                                                                                        |               |                                                              |
|----------------------------------------------------------------------------------------|---------------|--------------------------------------------------------------|
| GO:0007275                                                                             | GRMZM2G086573 | AP2-like ethylene-responsive transcription factor AIL5       |
| GO:0007275                                                                             | GRMZM2G104078 | putative NAC domain transcription factor superfamily protein |
| GO:0007275                                                                             | GRMZM2G180328 | putative NAC domain transcription factor superfamily protein |
| GO:0007275                                                                             | GRMZM2G177878 | uncharacterized protein                                      |
| GO:0007275                                                                             | GRMZM2G040762 | uncharacterized protein                                      |
| F:zma-miR397b-p5-GRMZM2G033230\ GO:0006355\ GO: 0006970\ GO: 0009409\ GO: 0009651-DEGs |               |                                                              |
| GO                                                                                     | Gene          | Description                                                  |
| GO:0006355                                                                             | GRMZM2G033230 | putative bZIP transcription factor superfamily protein       |
| GO:0006355                                                                             | GRMZM2G179325 | scarecrow-like protein 34                                    |
| GO:0006355                                                                             | GRMZM2G416701 | AP2-like ethylene-responsive transcription factor TOE3       |
| GO:0006355                                                                             | GRMZM2G033612 | uncharacterized protein                                      |
| GO:0006355                                                                             | GRMZM2G165488 | uncharacterized protein                                      |
| GO:0006355                                                                             | GRMZM2G380377 | DRE-binding protein 4                                        |
| GO:0006355                                                                             | GRMZM2G478417 | bZIP transcription factor TRAB1                              |
|                                                                                        |               | AP2-like ethylene-responsive transcription factor BBM2       |
| GO:0006355                                                                             | GRMZM2G399072 | isoform X2                                                   |
| GO:0006355                                                                             | GRMZM2G416701 | AP2-like ethylene-responsive transcription factor TOE3       |
| GO:0006355                                                                             | GRMZM2G061734 | SBP-transcription factor 5                                   |
| GO:0006355                                                                             | GRMZM2G180328 | putative NAC domain transcription factor superfamily protein |
| GO:0006355                                                                             | mbd109        | unknown                                                      |
| GO:0006355                                                                             | GRMZM2G104396 | Nuclear transcription factor Y subunit A-7                   |
| GO:0006355                                                                             | GRMZM5G829103 | nuclear transcription factor Y subunit A-10 isoform X1       |
| GO:0006355                                                                             | GRMZM2G086573 | AP2-like ethylene-responsive transcription factor AIL5       |
| GO:0006355                                                                             | GRMZM2G131577 | Transcription factor BTF3                                    |
| GO:0006355                                                                             | GRMZM2G119865 | ethylene-responsive transcription factor RAP2-9              |
| GO:0006355                                                                             | GRMZM2G061734 | SBP-transcription factor 5                                   |
| GO:0006355                                                                             | GRMZM2G141679 | ethylene-responsive transcription factor RAP2-13-like        |
| GO:0006355                                                                             | GRMZM2G091964 | uncharacterized protein LOC100282719 isoform X1              |
|                                                                                        |               | AP2-like ethylene-responsive transcription factor BBM2       |
| GO:0006355                                                                             | GRMZM2G399072 | isoform X2                                                   |
| GO:0006355                                                                             | GRMZM2G488465 | uncharacterized protein LOC100381775                         |
| GO:0006355                                                                             | GRMZM2G025062 | AP2-EREBP transcription factor, partial                      |
| GO:0006355                                                                             | GRMZM2G104078 | putative NAC domain transcription factor superfamily protein |
| GO:0006355                                                                             | GRMZM2G133568 | MADS-box transcription factor 27 isoform X1                  |
| GO:0006355                                                                             | GRMZM2G124566 | growth-regulating factor                                     |
| GO:0006355                                                                             | GRMZM2G409224 | uncharacterized protein LOC100273824                         |
| GO: 0006970                                                                            | GRMZM2G033230 | putative bZIP transcription factor superfamily protein       |
| GO: 0006970                                                                            | GRMZM2G141679 | ethylene-responsive transcription factor RAP2-13-like        |
| GO: 0009409                                                                            | GRMZM2G380377 | DRE-binding protein 4                                        |
| GO: 0009409                                                                            | GRMZM2G161245 | Malate dehydrogenase                                         |
| GO: 0009409                                                                            | GRMZM2G141679 | ethylene-responsive transcription factor RAP2-13-like        |
| GO: 0009409                                                                            | GRMZM2G033230 | putative bZIP transcription factor superfamily protein       |

|                                                                                 |               |                                                                   |
|---------------------------------------------------------------------------------|---------------|-------------------------------------------------------------------|
| GO: 0009651                                                                     | GRMZM2G141679 | ethylene-responsive transcription factor RAP2-13-like             |
| GO: 0009651                                                                     | GRMZM2G729818 | uncharacterized protein LOC100191463                              |
| GO: 0009651                                                                     | GRMZM2G153815 | heat shock 70 kDa protein                                         |
| GO: 0009651                                                                     | GRMZM2G033230 | putative bZIP transcription factor superfamily protein            |
| GO: 0009651                                                                     | GRMZM2G131577 | Transcription factor BTF3                                         |
| GO: 0009651                                                                     | GRMZM2G120652 | Pyridoxal 5'-phosphate synthase-like subunit PDX1.2               |
| GO: 0009651                                                                     | GRMZM2G478709 | pre-mRNA-splicing factor prp45                                    |
| H:miR444a-GRMZM2G399072- GO: 0007275\ GO: 0009873\ GO: 1905392\ GO:0005524-DEGs |               |                                                                   |
| GO                                                                              | Gene          | Description                                                       |
|                                                                                 | GRMZM2G399072 | AP2-like ethylene-responsive transcription factor BBM2 isoform X2 |
| GO: 0007275                                                                     |               |                                                                   |
| GO: 0007275                                                                     | GRMZM2G347043 | NAC1 transcription factor                                         |
| GO: 0007275                                                                     | GRMZM2G086573 | AP2-like ethylene-responsive transcription factor AIL5            |
| GO: 0007275                                                                     | GRMZM2G133568 | MADS-box transcription factor 27 isoform X1                       |
| GO: 0007275                                                                     | GRMZM2G104078 | putative NAC domain transcription factor superfamily protein      |
| GO: 0007275                                                                     | GRMZM2G180328 | putative NAC domain transcription factor superfamily protein      |
| GO: 0007275                                                                     | GRMZM2G177878 | uncharacterized protein                                           |
| GO: 0007275                                                                     | GRMZM2G040762 | uncharacterized protein                                           |
|                                                                                 | GRMZM2G399072 | AP2-like ethylene-responsive transcription factor BBM2 isoform X2 |
| GO: 0009873                                                                     |               |                                                                   |
| GO: 0009873                                                                     | GRMZM2G119865 | ethylene-responsive transcription factor RAP2-9                   |
| GO: 0009873                                                                     | GRMZM2G086573 | ponsive transcription factor AIL5                                 |
| GO: 0009873                                                                     | GRMZM2G141679 | ethylene-responsive transcription factor RAP2-13-like             |
| GO: 0009873                                                                     | GRMZM2G025062 | AP2-EREBP transcription factor, partial                           |
|                                                                                 | GRMZM2G399072 | AP2-like ethylene-responsive transcription factor BBM2 isoform X2 |
| GO: 1905392                                                                     |               |                                                                   |
| GO: 1905392                                                                     | GRMZM2G086573 | AP2-like ethylene-responsive transcription factor AIL5            |
| GO:0005524                                                                      | GRMZM2G104262 | cryptochrome 2                                                    |
| GO:0005524                                                                      | GRMZM2G359038 | uncharacterized protein                                           |
| GO:0005524                                                                      | GRMZM2G124566 | growth-regulating factor                                          |
| GO:0005524                                                                      | GRMZM5G890820 | uncharacterized protein                                           |

Note: (A) zma-miR169o-5p\_ R-1-*GRMZM2G165488* and related GO terms "GO: 0006355, GO: 0009793 and GO: 0016602" corresponding DEGs. (B ) zma-miR390a-5p-*GRMZM2G134396* and related GO terms " GO : 0009737, GO:0009793 , GO:0003876" and corresponding DEGs. (C) zma-miR396c\_ L-1- *GRMZM2G098594* and related GO terms " GO: 008757, GO-0032259 , GO: 0009739 , GO: 0030912 and other corresponding DEGs. (D) zma-miR396c\_ L-1- *GRMZM2G105335* and related GO terms "GO: 0009739, GO: 0030912 and other corresponding DEGs. (E) zma-miR396c\_ L-1- *GRMZM133568* and related GO terms " GO: 0000977, GO: 007275" and other corresponding DEGs. (F) zma-miR397b-p5-*GRMZM2G033230* and related GO terms"GO:0006355, GO: 0006970, GO: 0009409 and GO: 0009651 "corresponding DEGs. (G) zma-miR444a\_ 1ss12TC-*GRMZM2G399072* and related GO terms"GO : 0007275,GO : 0009873 and GO : 1905392"corresponding DEGs. (H) novel-miR4-*GRMZM2G009871* and related GO terms"GO:0046686 and GO:0005524" corresponding DEGs.
