# Supplementary material for: Identification of miRNAs Mediating Seed Storability of Maize during Germination Stage by High-Throughput Sequencing, Transcriptome and Degradome Sequencing
Source: MDPI journal article supplement (doi:10.3390/ijms232012339), 2022-10-15
Supplement: s1 [file s1]

**Supplementary Table S4 Putative miRNA and its corresponding target gene information**

| MiRNA                  | Transcript            | Description                                                       |
|------------------------|-----------------------|-------------------------------------------------------------------|
| <i>PC-3p-25167_195</i> | <i>GRMZM5G803490</i>  | uncharacterized protein LOC100284589                              |
| <i>PC-3p-46024_102</i> | <i>GRMZM2G104396</i>  | Nuclear transcription factor Y subunit A-7                        |
| <i>PC-3p-77755_56</i>  | <i>GRMZM2G025062</i>  | AP2-EREBP transcription factor, partial                           |
|                        | <i>Zm00001d019824</i> | uncharacterized protein LOC100381531                              |
|                        | <i>GRMZM2G058948</i>  | K(+) efflux antiporter 2, chloroplastic                           |
| <i>PC-3p-87703_49</i>  | <i>GRMZM2G172529</i>  | uncharacterized protein LOC100192543                              |
|                        | <i>GRMZM2G133006</i>  | uncharacterized protein LOC100272795                              |
| <i>PC-3p-91946_46</i>  | <i>GRMZM2G016602</i>  | protein recA isoform X1                                           |
| <i>PC-5p-46450_101</i> | <i>GRMZM2G009871</i>  | putative TCP-1/cpn60 chaperonin family protein                    |
|                        | <i>GRMZM2G009871</i>  | putative TCP-1/cpn60 chaperonin family protein                    |
| <i>PC-5p-58549_78</i>  | <i>GRMZM2G421212</i>  | GATA transcription factor 26                                      |
|                        | <i>GRMZM2G175425</i>  | uncharacterized protein LOC100275644                              |
|                        | <i>GRMZM2G140150</i>  | Pyruvate dehydrogenase E1 component alpha subunit                 |
|                        | <i>GRMZM2G151387</i>  | uncharacterized protein LOC100381870                              |
|                        | <i>GRMZM2G147811</i>  | Protein kinase superfamily protein                                |
| <i>PC-5p-58650_78</i>  | <i>GRMZM2G347043</i>  | NAC1 transcription factor                                         |
|                        | <i>GRMZM2G014022</i>  | probable F-box protein At2g36090                                  |
| <i>PC-5p-71261_62</i>  | <i>GRMZM2G304712</i>  | uncharacterized protein LOC100281303                              |
|                        | <i>GRMZM2G153815</i>  | heat shock 70 kDa protein                                         |
| <i>PC-5p-80184_54</i>  | <i>GRMZM2G347043</i>  | NAC1 transcription factor                                         |
|                        | <i>GRMZM2G120320</i>  | WRKY transcription factor WRKY71                                  |
|                        | <i>Zm00001d037605</i> | GATA transcription factor 23                                      |
| <i>PC-5p-8044_611</i>  | <i>GRMZM2G006578</i>  | putative bZIP transcription factor superfamily protein isoform X1 |
|                        | <i>GRMZM2G120320</i>  | WRKY transcription factor WRKY71                                  |
|                        | <i>GRMZM2G086573</i>  | AP2-like ethylene-responsive transcription factor AIL5            |
|                        | <i>GRMZM2G006578</i>  | putative bZIP transcription factor superfamily protein isoform X1 |
|                        | <i>GRMZM2G127548</i>  | BSD domain containing protein                                     |
