# Supplementary material for: Identification of miRNAs Mediating Seed Storability of Maize during Germination Stage by High-Throughput Sequencing, Transcriptome and Degradome Sequencing
Source: MDPI journal article supplement (doi:10.3390/ijms232012339), 2022-10-15
Supplement: s1 [file s1]

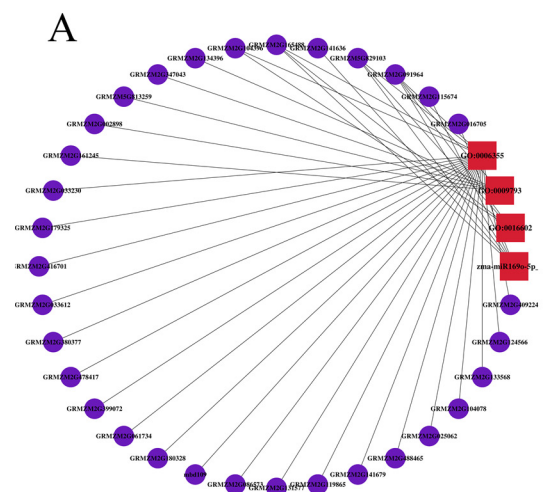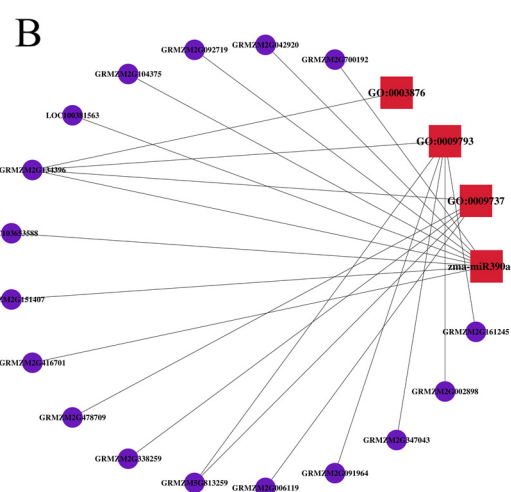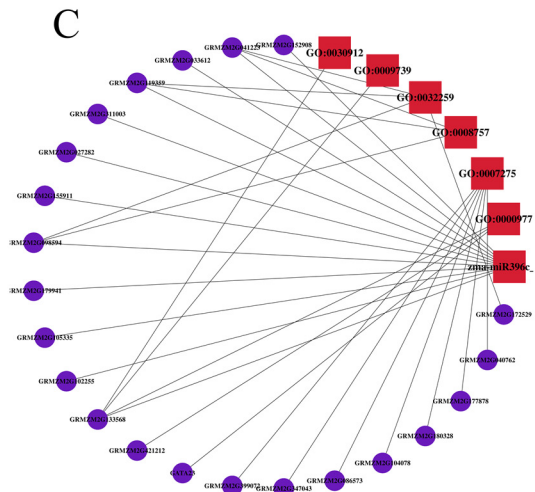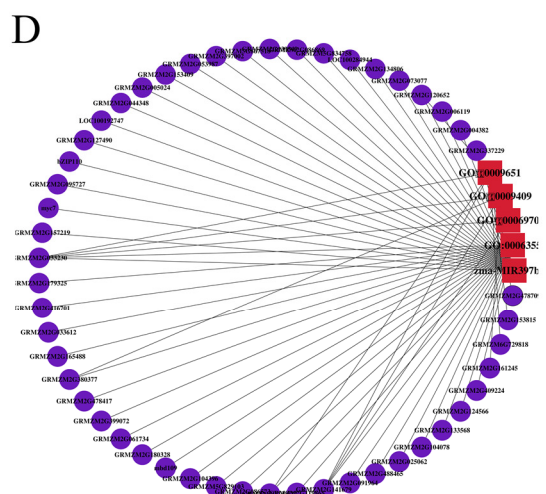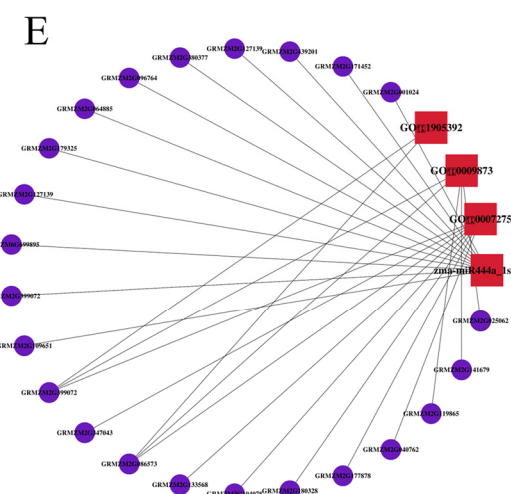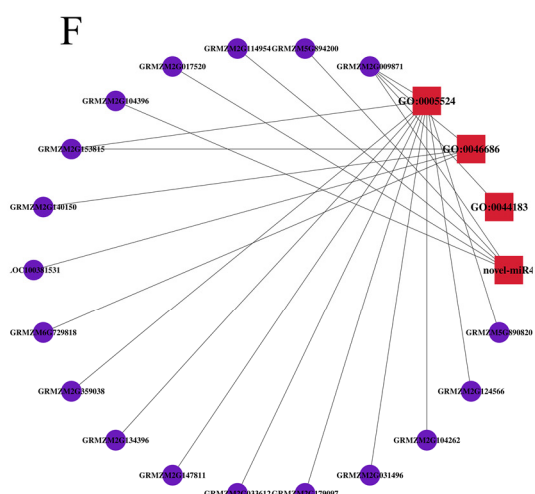

**Supplementary Figure S2. miRNA-mRNA network related to GO terms of target genes.**

Note: (A) zma-miR169o-5p\_R-1-*GRMZM2G165488* and related GO terms "GO: 0006355, GO: 0009793 and GO: 0016602" corresponding DEGs, (B ) zma-miR390a-5p-*GRMZM2G134396* and related GO terms " GO : 0009737, GO:0009793 and GO:0003876" corresponding DEGs, (C) zma-miR396c\_ L-1-*GRMZM2G098594/GRMZM2G105335/GRMZM133568* and related GO terms "GO: 0000977, GO: 007275, GO: 008757, GO-0032259" and other corresponding DEGs. (D ) zma-miR397b-p5-*GRMZM2G033230* and related GO terms "GO:0006355, GO: 0006970, GO: 0009409 and GO: 0009651 "corresponding DEGs, (E ) zma-miR444a\_1ss12TC-*GRMZM2G399072* and related GO terms "GO: 0007275,GO: 0009873 and GO: 1905392" corresponding DEGs, (F ) novel-miR4-*GRMZM2G009871* and related GO terms "GO:0046686 and GO:0005524" corresponding DEGs.
