# Supplementary material for: Identification of miRNAs Mediating Seed Storability of Maize during Germination Stage by High-Throughput Sequencing, Transcriptome and Degradome Sequencing
Source: MDPI journal article supplement (doi:10.3390/ijms232012339), 2022-10-15
Supplement: s1 [file s1]

**Supplementary Table S6 KEGG level histogram of differentially expressed genes in comparison group AA156VSAA237**

| Index | Pathway_ID | KEGG_Level_1                         | B   | S   | Up_Num | Down_Num | Rich.Factor | -log10(P) |
|-------|------------|--------------------------------------|-----|-----|--------|----------|-------------|-----------|
| 1     | zma04146   | Cellular Processes                   | 214 | 87  | 28     | 59       | 0.4065      | 2.183462  |
| 2     | zma04144   | Cellular Processes                   | 494 | 170 | 101    | 69       | 0.3441      | 0.742772  |
| 3     | zma04136   | Cellular Processes                   | 83  | 25  | 14     | 11       | 0.3012      | 0.147602  |
| 4     | zma04145   | Cellular Processes                   | 211 | 63  | 34     | 29       | 0.2986      | 0.091641  |
| 5     | zma02010   | Environmental Information Processing | 212 | 79  | 44     | 35       | 0.3726      | 1.120632  |
| 6     | zma04075   | Environmental Information Processing | 842 | 291 | 142    | 149      | 0.3456      | 1.034113  |
| 7     | zma04016   | Environmental Information Processing | 495 | 168 | 70     | 98       | 0.3394      | 0.608224  |
| 8     | zma04070   | Environmental Information Processing | 212 | 71  | 39     | 32       | 0.3349      | 0.403461  |
| 9     | zma03410   | Genetic Information Processing       | 106 | 41  | 25     | 16       | 0.3868      | 0.990936  |
| 10    | zma04141   | Genetic Information Processing       | 570 | 200 | 118    | 82       | 0.3509      | 1.043236  |
| 11    | zma00970   | Genetic Information Processing       | 163 | 57  | 35     | 22       | 0.3497      | 0.571777  |
| 12    | zma04122   | Genetic Information Processing       | 23  | 8   | 1      | 7        | 0.3478      | 0.316842  |
| 13    | zma04120   | Genetic Information Processing       | 358 | 116 | 50     | 66       | 0.324       | 0.279984  |
| 14    | zma03420   | Genetic Information Processing       | 266 | 84  | 39     | 45       | 0.3158      | 0.19362   |
| 15    | zma03440   | Genetic Information Processing       | 279 | 87  | 44     | 43       | 0.3118      | 0.158218  |
| 16    | zma03430   | Genetic Information Processing       | 207 | 63  | 41     | 22       | 0.3043      | 0.122375  |
| 17    | zma03030   | Genetic Information Processing       | 238 | 69  | 41     | 28       | 0.2899      | 0.051406  |
| 18    | zma03450   | Genetic Information Processing       | 11  | 3   | 2      | 1        | 0.2727      | 0.127211  |
| 19    | zma04130   | Genetic Information Processing       | 69  | 17  | 7      | 10       | 0.2464      | 0.027737  |
| 20    | zma01502   | Human Diseases                       | 2   | 1   | 1      | 0        | 0.5         | 0.264844  |
| 21    | zma04933   | Human Diseases                       | 70  | 24  | 8      | 16       | 0.3429      | 0.383558  |
| 22    | zma00073   | Metabolism                           | 66  | 34  | 19     | 15       | 0.5152      | 3.004621  |
| 23    | zma00053   | Metabolism                           | 113 | 55  | 23     | 32       | 0.4867      | 3.639326  |

|    |          |                    |     |     |     |    |        |          |
|----|----------|--------------------|-----|-----|-----|----|--------|----------|
| 24 | zma00520 | Metabolism         | 320 | 142 | 74  | 68 | 0.4438 | 5.383796 |
| 25 | zma00052 | Metabolism         | 207 | 88  | 47  | 41 | 0.4251 | 2.858479 |
| 26 | zma00500 | Metabolism         | 446 | 178 | 81  | 97 | 0.3991 | 3.368156 |
| 27 | zma04626 | Organismal Systems | 553 | 207 | 109 | 98 | 0.3743 | 2.205636 |
| 28 | zma04712 | Organismal Systems | 214 | 57  | 29  | 28 | 0.2664 | 0.011944 |
