# Supplementary material for: Identification of miRNAs Mediating Seed Storability of Maize during Germination Stage by High-Throughput Sequencing, Transcriptome and Degradome Sequencing
Source: MDPI journal article supplement (doi:10.3390/ijms232012339), 2022-10-15
Supplement: s1 [file s1]

**Supplementary Table S1 Reading of each microRNA measured by small RNA sequencing data**

|             | AA156_24h1 |       |      | AA156_24h2 |       |      | AA156_24h3 |       |      | AA237_24h1 |       |      | AA237_24h2 |       |      | AA237_24h3 |       |      |
|-------------|------------|-------|------|------------|-------|------|------------|-------|------|------------|-------|------|------------|-------|------|------------|-------|------|
|             | % of       |       |      | % of       |       |      | % of       |       |      | % of       |       |      | % of       |       |      | % of       |       |      |
| lib         | Total      | Total | uniq |
|             | 1344       |       | 2042 | 1372       |       | 2128 | 1406       |       | 2711 | 1382       |       | 2677 | 1416       |       | 2101 | 13979      |       | 1665 |
| Raw reads   | 5996       | 100   | 901  | 1081       | 100   | 848  | 7318       | 100   | 172  | 6716       | 100   | 869  | 3904       | 100   | 323  | 661        | 100   | 752  |
| 3ADT&len    | 7935       |       | 6674 | 8014       |       | 7768 | 5612       |       | 6430 | 5753       |       | 5471 | 9743       |       | 5989 | 10843      |       | 6765 |
| gth filter  | 369        | 59.02 | 20   | 783        | 58.41 | 75   | 423        | 39.9  | 28   | 479        | 41.61 | 71   | 645        | 68.79 | 96   | 180        | 77.56 | 55   |
|             |            |       |      | 1181       |       |      | 1783       |       |      | 1312       |       |      | 1016       |       |      |            |       |      |
| Junk reads  | 6193       | 0.05  | 3381 | 7          | 0.09  | 5535 | 2          | 0.13  | 9338 | 0          | 0.09  | 6784 | 6          | 0.07  | 5568 | 7896       | 0.06  | 3966 |
|             | 5504       |       | 6640 | 5694       |       | 7713 | 8437       |       | 6336 | 8060       |       | 5403 | 4410       |       | 5934 | 31285      |       | 6725 |
| Clean reads | 434        | 40.94 | 39   | 481        | 41.5  | 40   | 063        | 59.98 | 90   | 117        | 58.29 | 87   | 093        | 31.14 | 28   | 85         | 22.38 | 89   |
|             | 4479       |       |      | 5391       |       |      | 6093       |       |      | 8528       |       | 1012 | 3765       |       |      | 33704      |       |      |
| Rfam        | 70         | 3.33  | 6540 | 92         | 3.93  | 8477 | 20         | 4.33  | 8139 | 87         | 6.17  | 5    | 91         | 2.66  | 8114 | 6          | 2.41  | 7660 |
|             | 1759       |       | 2071 | 1770       |       | 2287 | 2964       |       | 3102 | 1885       |       | 3001 | 8007       |       | 1791 | 60848      |       | 1309 |
| mRNA        | 825        | 13.09 | 8    | 754        | 12.91 | 3    | 235        | 21.07 | 9    | 747        | 13.64 | 2    | 19         | 5.65  | 2    | 9          | 4.35  | 1    |
| Repeats     | 5015       | 0.04  | 172  | 5615       | 0.04  | 198  | 3068       | 0.02  | 158  | 7879       | 0.06  | 218  | 6464       | 0.05  | 164  | 6857       | 0.05  | 139  |
|             | 3414       |       | 1346 | 3525       |       | 1316 | 5080       |       | 2021 | 5524       |       | 2085 | 3330       |       | 1472 | 22661      |       | 9659 |
| valid reads | 551        | 25.39 | 081  | 350        | 25.69 | 760  | 938        | 36.12 | 241  | 271        | 39.95 | 662  | 512        | 23.51 | 270  | 88         | 16.21 | 42   |
