# Supplementary material for: Identification of miRNAs Mediating Seed Storability of Maize during Germination Stage by High-Throughput Sequencing, Transcriptome and Degradome Sequencing
Source: MDPI journal article supplement (doi:10.3390/ijms232012339), 2022-10-15
Supplement: s1 [file s1]

**Supplementary Table S9 Primer sequences**

| miRNA /Gene name            | Primers            | Primer sequence(5'-3')              |
|-----------------------------|--------------------|-------------------------------------|
| U6                          | F                  | GGAGGCAGAGGCATTGGA                  |
|                             | R                  | CCCACCTTTGTTACCACTTTG               |
| zma-miR169o-5p_R-1          | RT primer          | GTCGTATCCAGTGCAGGGTCCGAGGTAT        |
|                             |                    | TCGCACTGGATACGACAGGCAA              |
|                             | Forward primer     | CGCTGCATTAGCCAAGAATGA               |
| zma-miR390a-5p              | RT primer          | GTCGTATCCAGTGCAGGGTCCGAGGTAT        |
|                             |                    | TCGCACTGGATACGACGGCGCT              |
|                             | Forward primer     | AATTGTACAAGCTCAGGAGGGA              |
| zma-miR396c_L-1             | RT primer          | GTCGTATCCAGTGCAGGGTCCGAGGTAT        |
|                             |                    | TCGCACTGGATACGACCAGTTC              |
|                             | Forward primer     | AACGGCTCCACAGGCTTTC                 |
| zma-miR444a_1ss12TC         | RT primer          | GTCGTATCCAGTGCAGGGTCCGAGGTAT        |
|                             |                    | TCGCACTGGATACGACAAGCTT              |
|                             | Forward primer     | AATTGTACTGCAGTTGTTGCCT              |
| zma-miR397b-p5              | RT primer          | GTCGTATCCAGTGCAGGGTCCGAGGTATTCGCACT |
|                             |                    | GGATACGACGCTCATC                    |
|                             | Forward primer     | AAGCACTTGAGCGCAGCGTT                |
| PC-5p-46450_101 (novel-miR) | RT primer          | GTCGTATCCAGTGCAGGGTCCGAGGTATTCGCACT |
|                             |                    | GGATACGACGCAATGA                    |
|                             | Forward primer     | CGCCGGTCCAAGTCAATGCA                |
| General reverse primer      |                    | CAGTGCAGGGTCCGAGGTAT                |
| $\beta$ -actin              | $\beta$ -actin-F   | CATCCACGAGACCACCTACAA               |
|                             | $\beta$ -actin-R   | CGAGCCACCAATCCAAACA                 |
| GRMZM2G165488               | GRMZM2G165488-F    | CCGATGGCTGTTGTCTGTAGG               |
|                             | GRMZM2G165488-R    | ACCCAAGCACCTGGAATTCA                |
| GRMZM2G134396               | GRMZM2G134396-F    | CGACTATCATCGGAACCC                  |
|                             | GRMZM2G134396-R    | TCCAAAGTGAAGCAGCAA                  |
| GRMZM2G105335               | GRMZM2G105335-F    | CACCAGAAGGGGGACAAGG                 |
|                             | GRMZM2G105335-R    | CCACCGTTACGGAAGCG                   |
| GRMZM2G098594               | GRMZM2G098594-F    | AGCGTCATCGGGGAACAA                  |
|                             | GRMZM2G098594-R    | TGGGAGTGGGACTGGGAGTA                |
| GRMZM2G399072               | GRMZM2G399072-F    | GGGTCGCTGGCAATAAGGA                 |
|                             | GRMZM2G399072-R    | AAGTTGGTCACCGCGTTGAG                |
| GRMZM2G133568               | GRMZM2G133568-F    | TGATGGGAGAGGATCTTTCTGG              |
|                             | GRMZM2G133568-R    | CCTTTCGATTCAATTCGTGGA               |
| GRMZM2G033230               | GRMZM2G033230-F    | ATGGACGATGGAGCTGACCT                |
|                             | GRMZM2G033230-R    | CGCTGCTGAAGAACTCGTCG                |
| GRMZM2G009871               | GRMZM2G009871-F    | GCTCATCCACGACGACAAGG                |
|                             | GRMZM2G009871-R    | CAGTAGTTGTCCCATCGCCG                |
| GRMZM2G165488               | GRMZM2G165488-GNSP | CAGCAGCAGCAGCAGCAGCAGCAGCGACCA      |
|                             | GRMZM2G165488-GSP  | CAGCAGCAGCGACCATAATGGAGGCGCCAA      |

---

|                      |                           |                        |
|----------------------|---------------------------|------------------------|
| <i>GRMZM2G399072</i> | <i>GRMZM2G399072-GNSP</i> | TCATTGAAGAATAACATGCATG |
|                      | <i>GRMZM2G399072-GSP</i>  | TGCATGCATGTGGAACCATTAC |

---
