# Supplementary material for: Identification of miRNAs Mediating Seed Storability of Maize during Germination Stage by High-Throughput Sequencing, Transcriptome and Degradome Sequencing
Source: MDPI journal article supplement (doi:10.3390/ijms232012339), 2022-10-15
Supplement: s1 [file s1]

**Supplementary Table S2 A total of 20 putative miRNAs were differentially expressed**

| miR_name        | miR_seq                      | up/down | fold_change(AA156_24h(mean)/AA237_24h(mean)) | log2(fold_change) | pvalue(t_test) | AA237_24h(mean) | AA156_24h(mean) |
|-----------------|------------------------------|---------|----------------------------------------------|-------------------|----------------|-----------------|-----------------|
| PC-5p-8044_611  | TAGGTCTTGTTTGGCTG<br>CACT    | up      | 2.347774                                     | 1.231294          | 0.0000         | 7.4             | 17.5            |
| PC-5p-162391_23 | ATCTCCGACGGCTAGTT<br>ACGAGGC | up      | 49.06233                                     | 5.616544          | 0.0012         | 0.1             | 4.9             |
| PC-3p-50720_92  | ATCTCCGACGGTCTCGT<br>ACAGAGC | down    | 0.009239                                     | -6.75801          | 0.0024         | 10.8            | 0.1             |
| PC-5p-46450_101 | TCCAAGTCAATGCATCA<br>TTGC    | down    | 0.00378                                      | -8.04753          | 0.0030         | 26.5            | 0.1             |
| PC-3p-87703_49  | ATGTCCGACGGCCTCGT<br>ACAGGGC | down    | 0.008986                                     | -6.79805          | 0.0047         | 11.1            | 0.1             |
| PC-3p-77755_56  | GATCAACATTATGTGGC<br>CTGGA   | up      | 66.25966                                     | 6.050059          | 0.0097         | 0.1             | 6.6             |
| PC-3p-123986_32 | AATAGCGCTATTTCCGA<br>CGGTACC | down    | 0.011775                                     | -6.40813          | 0.0103         | 8.5             | 0.1             |
| PC-3p-91946_46  | AATCTGACGGAAACGA<br>ATAAGGCC | down    | 0.019525                                     | -5.67855          | 0.0129         | 5.1             | 0.1             |
| PC-3p-47955_98  | AACGAGTTAGTAACGTG<br>GGTACCC | down    | 0.003429                                     | -8.18796          | 0.0137         | 29.2            | 0.1             |
| PC-3p-24381_202 | ATCGTATTAAAAACGTC<br>GGTACCC | up      | 50.06643                                     | 5.645772          | 0.0194         | 0.1             | 5.0             |
| PC-5p-26341_186 | ATTACTGTGGCAAGCCA<br>ACGGCCT | down    | 0.063961                                     | -3.96667          | 0.0265         | 92.5            | 5.9             |

|                     |                              |      |          |          |        |      |      |
|---------------------|------------------------------|------|----------|----------|--------|------|------|
| PC-5p-<br>58650_78  | AGGAGGATAGGTCCCAC<br>CCGC    | down | 0.192434 | -2.37757 | 0.0318 | 17.6 | 3.4  |
| PC-5p-<br>58549_78  | CTAATCCACATGTATTG<br>AGGTG   | down | 0.009212 | -6.76232 | 0.0364 | 10.9 | 0.1  |
| PC-3p-<br>46024_102 | AGCTTATGTCCGACGGC<br>TTTGCC  | up   | 80.9108  | 6.33826  | 0.0368 | 0.1  | 8.1  |
| PC-5p-<br>80184_54  | GTATCTTCGGTCGTCGA<br>ACTT    | up   | 256.4596 | 8.002588 | 0.0373 | 0.1  | 25.6 |
| PC-5p-<br>71261_62  | TGGTCTTGCCACCGTGT<br>CGTCC   | down | 0.004632 | -7.75426 | 0.0388 | 21.6 | 0.1  |
| PC-3p-<br>20927_237 | AATCCCCTCTGAATTAG<br>TGTAACC | down | 0.003399 | -8.20079 | 0.0431 | 29.4 | 0.1  |
| PC-3p-<br>102177_41 | AAACCCCTTCGGTATTT<br>GGACTCC | up   | 66.60729 | 6.057608 | 0.0446 | 0.1  | 6.7  |
| PC-3p-<br>25167_195 | TTATAGTCCCCTCAATT<br>CTCT    | up   | 130.5913 | 7.028915 | 0.0456 | 0.1  | 13.1 |
| PC-5p-<br>150211_25 | TTGCTTGGGAGCTAGGA<br>CCCGAGA | down | 0.006503 | -7.26471 | 0.0495 | 15.4 | 0.1  |
