# Supplementary material for: Identification of miRNAs Mediating Seed Storability of Maize during Germination Stage by High-Throughput Sequencing, Transcriptome and Degradome Sequencing
Source: MDPI journal article supplement (doi:10.3390/ijms232012339), 2022-10-15
Supplement: s1 [file s1]

[illegible]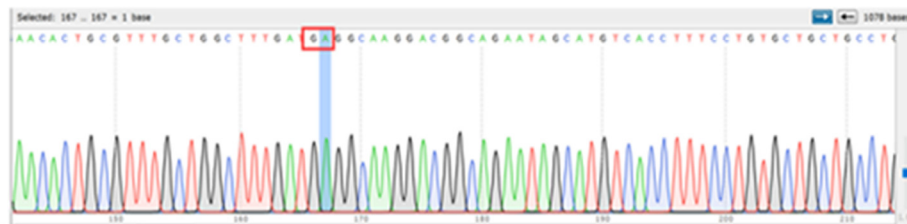

CCGCTGGGGAGCAATTAAGAGAGCTCTGTGGCTAAGTACAGAGAACCCTCATCTGTGGCTTATCGAAATTAATACGACCTACCTA  
TAGGGAGACCAAGCTGGCTAGCTGTAAATTAAGCTTGTGACGAGCTCGAATCGGAACCATCGCTTGTTCGGCTTGTAG  
GTTGGCGAGAGAGATATTTGGCTACTGCTCCCTGCAAGCGAGATGCTGATCGATGCAATGCGACCTCGCCGCTTCTTCGCGA  
AGATGGCGACAATTTGGCCGACAATGATGTAATGATGTTCCACATGATGCAATGTATTATTTCAATGATCTCGAGTCTAGAG  
GGCCCGTTTAAACCCGCTGATCAGGCTCGACTGTGCTTCTAGTGTCCAGCGAATCTGTTGTTGCCCTCCGCTCGCTGCTCCT  
TTGACCTCGGAAGTGCCACTCCCATCTCCTTTTCTCAATAAATGAGGAATAATGCACTGAGTGTCTGAGTAGGGTGTCATCT  
TATTTGGGGGCTGGGGTGGGCGAGGACATCGGAGGAGGAGATTGGGAAGACAATAGCAGCATCTGCGGTAGCTGGGGATCGGTGG  
GCTCTATGGCTTCTGAGGCCGGAAGAACACGCTGGGGCTCTAGGGGGTATCCCCAGCGCCCTGTGAGCGCGCATTAAGCGC  
GGCGGCTGTGGTGGTATCGCCGACAGCTGACGCGTCACTTGGCAGCGCTTACGCGCCGCTCTTCGCTTCTTCTCCTCT  
TTTCTCGCCAGCTGCGCGGCTTCTCCCGCTCAAGCTCTAAATCGGGGGCTCTTAAAGGTTCCGATTTAGTGCTTTAAGCGCA  
CTCGACGCAAAAAAATCTGATTAGGTTAGGTGACATGAGTGGGCCATCGCCGTATAGACGGTCTTTCGCCCTTTTGACG  
TTGGAATCGACGTTCTTATTAATGTGGACTCTTGTTCGCAATCGTGAACAACATCAACCTATCTTCGGGTCAITCTTTGATTA  
TAAGGGTATTTGGCCATTTCCGGCTATTTGGTATGTTAAAAATGAGCTGTATTAACAAAATTTAAGCGCAATTAATTTGTGGAAAT  
GGGTCATGTAGGGGTGGGAAGCCCGAGGCTCCAGCAGGCAAAATTTGGAATAATGTTTCAATTAATCCCAACCCCGGGGA  
AAATCCCCC

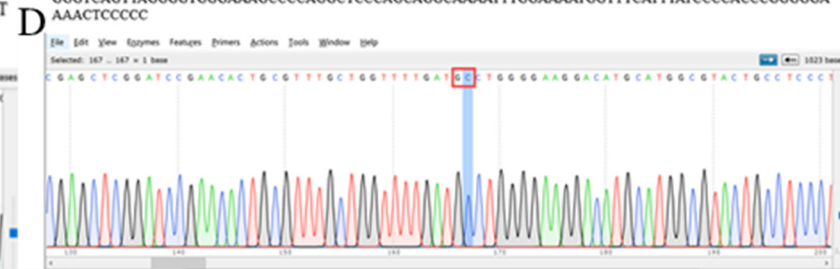

**Supplementary Figure S3. miRNA predicts binding site and cleavage site sequence peak map.** (A) zma-miR169o-5p\_ R-1 predicted binding site, the red part indicates the predicted microRNA binding site, the yellow part indicates the target gene sequence, Underlined is the race connector sequence. (B) zma-miR169o-5p\_ R-1 cleavage site sequencing peak map. (C) zma-miR444a\_ 1ss12tc predicted binding site, the red part indicates the predicted microRNA binding site, the yellow part indicates the target gene sequence, Underlined is the race connector sequence. (D) zma-miR444a\_ 1ss12tc cleavage site sequencing peak map.
